# Supplementary material for: A multiple case study of pre-diabetes care undertaken by general practice in Aotearoa/New Zealand: de-incentivised and de-prioritised work
Source: Springer Nature journal article supplement (doi:10.1186/s12875-023-02053-1), 2023-04-29
Supplement: MOESM1 [file 25300088]

**Supplementary files:** Barthow, et al 2023: A multiple case study of pre-diabetes care undertaken by general practice in Aotearoa/New Zealand: de-incentivised and de-prioritised work

Supplementary Table 1 Clinical notes data coding, extraction, and presentation procedures

For each set of notes:

1. A summary profile of each patient was developed
2. Serial HbA1c and body mass index (BMI) data were extracted
3. Notes were coded and data extracted in a dichotomous manner in six-month time frames and according to provider type for the presence or absence of
  - a. four key evidence-based diabetes prevention recommendations - weight reduction; physical activity, dietary modification, and smoking cessation
  - b. other health promotion activities including blood pressure monitoring; cardiovascular risk screening; immunisations; and cervical screening
4. The frequency of face-to-face visits were recorded according to six-month timeframes and provider type (GP, nurse, health support worker)
5. Where diabetes prevention activities occurred a summary of the reason for the visit was recorded and the specific diabetes prevention notes extracted and coded by provider type
6. A composite clinical note summary was created using Excel displaying the data in a sequential and graphic format with the accompanying profile and clinical note data
7. Summary findings from the clinical notes were generated and included in the summary

Legend and coding notes for Supplementary Figure 1A and 1B

| Serial HbA1c and BMI graph                                                                                                                                                                                                                                                                                                                                                                                                                                                                                                                                                                                                                                                                                  | Notes                                                                                                                                                                                                                                                                                                                                                                                                                                                                                                                                                                                                                                                                                                    |
|-------------------------------------------------------------------------------------------------------------------------------------------------------------------------------------------------------------------------------------------------------------------------------------------------------------------------------------------------------------------------------------------------------------------------------------------------------------------------------------------------------------------------------------------------------------------------------------------------------------------------------------------------------------------------------------------------------------|----------------------------------------------------------------------------------------------------------------------------------------------------------------------------------------------------------------------------------------------------------------------------------------------------------------------------------------------------------------------------------------------------------------------------------------------------------------------------------------------------------------------------------------------------------------------------------------------------------------------------------------------------------------------------------------------------------|
|  Serial HbA1c<br> Serial BMI<br> Patient notified HbA1c result                                                                                                                                                                                                                                                                                                                                                                                     | <ol style="list-style-type: none"> <li>1. Coding does not distinguish between clinician note to self-versus direct discussion with patient – see clinical notes for details</li> <li>2. Dietary advice and physical activity recommendations were coded under pre-diabetes activities regardless of the rationale for recommendation - e.g., if physical activity was recommended for mental health, it was still coded as beneficial for pre-diabetes</li> <li>3. For serial pre-diabetes assessment &amp; management and other health screening and health protection activities data icons reflect the presence of an activity or mention in the notes but not the frequency of occurrence</li> </ol> |
| <b>Provider colour codes</b><br> General practitioner<br> Nurse<br> Health support worker                                                                                                                                                                                                                                                                                                                                                          |                                                                                                                                                                                                                                                                                                                                                                                                                                                                                                                                                                                                                                                                                                          |
| <b>Pre-diabetes assessment and management</b><br> Weight<br> Physical activity<br> Diet<br> Smoking Cessation<br> Lifestyle intervention - unspecified<br> Metformin discussed/prescribed |                                                                                                                                                                                                                                                                                                                                                                                                                                                                                                                                                                                                                                                                                                          |
| <b>Health screening and protection activities</b><br> Immunisation<br> Cervical screening<br> Cardiovascular risk screening<br> Blood pressure measured                                                                                                                                                                                                         |                                                                                                                                                                                                                                                                                                                                                                                                                                                                                                                                                                                                                                                                                                          |

| Case ID             | Practice A Case F                                          | Summary                                                                                                                                                                                                                                                                                                                                                                    | Clinical notes                                                                                                                |
|---------------------|------------------------------------------------------------|----------------------------------------------------------------------------------------------------------------------------------------------------------------------------------------------------------------------------------------------------------------------------------------------------------------------------------------------------------------------------|-------------------------------------------------------------------------------------------------------------------------------|
| Age range           | 55-60                                                      | <ul style="list-style-type: none"> <li>Reluctant to stop smoking</li> <li>No detail of dietary / physical activity discussion (multiple refusals smoking cessation support) focus appears target driven</li> <li>GP management</li> <li>Hard to interpret when notes were direct discussion with patient vs comment to alert staff/self for future appointments</li> </ul> | <p>Feb 2012 GP</p> <p>Patient advised of results as per borderline diabetic P:needs to get wt close to 70kg, annual HbA1c</p> |
| Gender              | Female                                                     |                                                                                                                                                                                                                                                                                                                                                                            |                                                                                                                               |
| BMI range           | Overweight                                                 |                                                                                                                                                                                                                                                                                                                                                                            |                                                                                                                               |
| Ethnicity           | Cook Island Maori                                          |                                                                                                                                                                                                                                                                                                                                                                            |                                                                                                                               |
| Smoking Status      | Current smoker                                             |                                                                                                                                                                                                                                                                                                                                                                            |                                                                                                                               |
| Family History T2DM | Yes                                                        |                                                                                                                                                                                                                                                                                                                                                                            |                                                                                                                               |
| Co-morbidities      | Musculoskeletal                                            |                                                                                                                                                                                                                                                                                                                                                                            |                                                                                                                               |
| Regular medications | 3                                                          |                                                                                                                                                                                                                                                                                                                                                                            |                                                                                                                               |
| Year diagnosed      | 2012                                                       | <p>June 2015 GP</p> <p>Presentation: smear Still smoking , less than she used to, about 5/d, not interested in help stopping...<br/>O:\we 83.4 \bp 154/86</p> <p>....</p> <p>Assessment of finger</p> <p>.....</p> <p>re start statin ...plan re finger....</p> <p>Watch wt as going up &amp; HbA1c isq but wt gain is biggest risk to going on to get niddm</p>           |                                                                                                                               |
| Dashboard           | Diabetes screening , Conditions of interest, not on recall |                                                                                                                                                                                                                                                                                                                                                                            |                                                                                                                               |
| Referrals offered   | Surgical                                                   |                                                                                                                                                                                                                                                                                                                                                                            |                                                                                                                               |

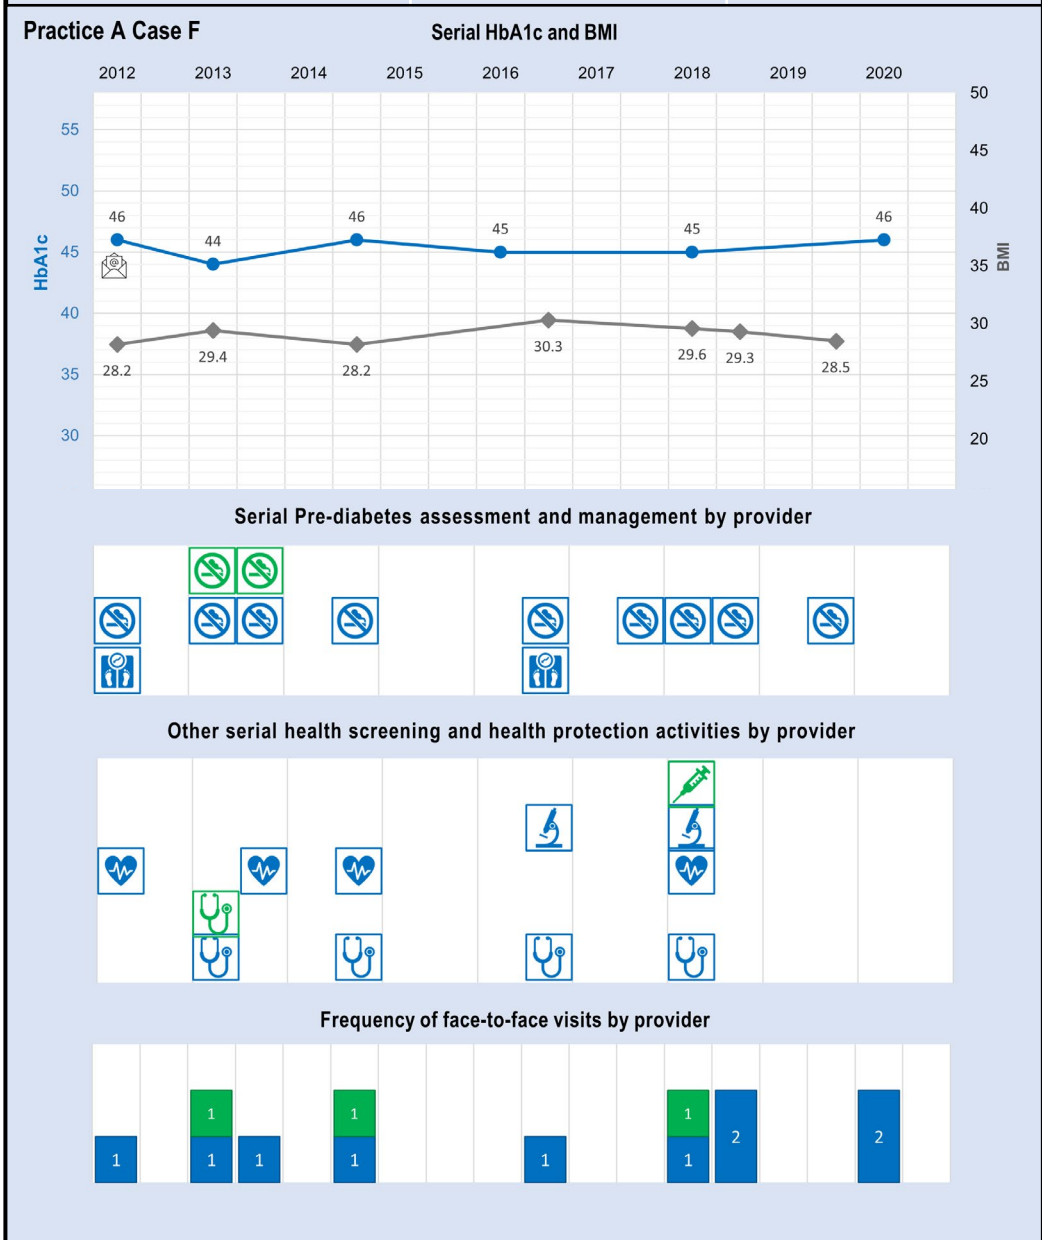

May 2018 GP

[lbx:HbA1c 45-stable] Message left for patient to call back re lipids & CVR risk, ultimately more value in stopping smoking than taking statin (via voice mail)

May 2019 GP

Text from Gp to get annual prediabetes bloods done

Supplementary Figure 1A Case review example 1

| Case ID             | Practice B Case E                                          | Summary                                                                                                                                                                                                                                                                                                                                                                                       | Clinical notes                                                                                                                                                                                                 |
|---------------------|------------------------------------------------------------|-----------------------------------------------------------------------------------------------------------------------------------------------------------------------------------------------------------------------------------------------------------------------------------------------------------------------------------------------------------------------------------------------|----------------------------------------------------------------------------------------------------------------------------------------------------------------------------------------------------------------|
| Age range           | 60-65                                                      | <ul style="list-style-type: none"> <li>• Very complex case, multiple walk-in appointments. Significant other issues, impinging on the ability to work with pre-diabetes</li> <li>• Not clear if early HbA1c results discussed</li> <li>• Increasing BMI reflected in rising HbA1c</li> <li>• Dietary and physical activity advice interwoven as part of other health interventions</li> </ul> | <p>Presenting issue: Cervical smear<br/>...currently smoking again after 2 years being a non-smoker<br/>cessation advise given, at this stage not wanting to quit aware she can come back for treatment...</p> |
| Gender              | Female                                                     |                                                                                                                                                                                                                                                                                                                                                                                               |                                                                                                                                                                                                                |
| BMI range           | Normal - obese                                             |                                                                                                                                                                                                                                                                                                                                                                                               |                                                                                                                                                                                                                |
| Ethnicity           | Māori                                                      |                                                                                                                                                                                                                                                                                                                                                                                               |                                                                                                                                                                                                                |
| Smoking status      | Ex-smoker                                                  |                                                                                                                                                                                                                                                                                                                                                                                               |                                                                                                                                                                                                                |
| Family History T2DM | Yes                                                        |                                                                                                                                                                                                                                                                                                                                                                                               |                                                                                                                                                                                                                |
| Co-morbidities      | Mental health                                              |                                                                                                                                                                                                                                                                                                                                                                                               |                                                                                                                                                                                                                |
| Regular medications | 1                                                          |                                                                                                                                                                                                                                                                                                                                                                                               |                                                                                                                                                                                                                |
| Year diagnosed      | Unclear - pre-2013?                                        |                                                                                                                                                                                                                                                                                                                                                                                               |                                                                                                                                                                                                                |
| Dashboard           | Recalls HbA1c for pre-diabetes and CVD                     |                                                                                                                                                                                                                                                                                                                                                                                               |                                                                                                                                                                                                                |
| Referrals offered   | Surgical, neurological, mental health, HIP (mental health) | <p>Jul 2013 Ns</p> <p>May 2014 Ns</p> <p>April 2017 GP</p>                                                                                                                                                                                                                                                                                                                                    |                                                                                                                                                                                                                |

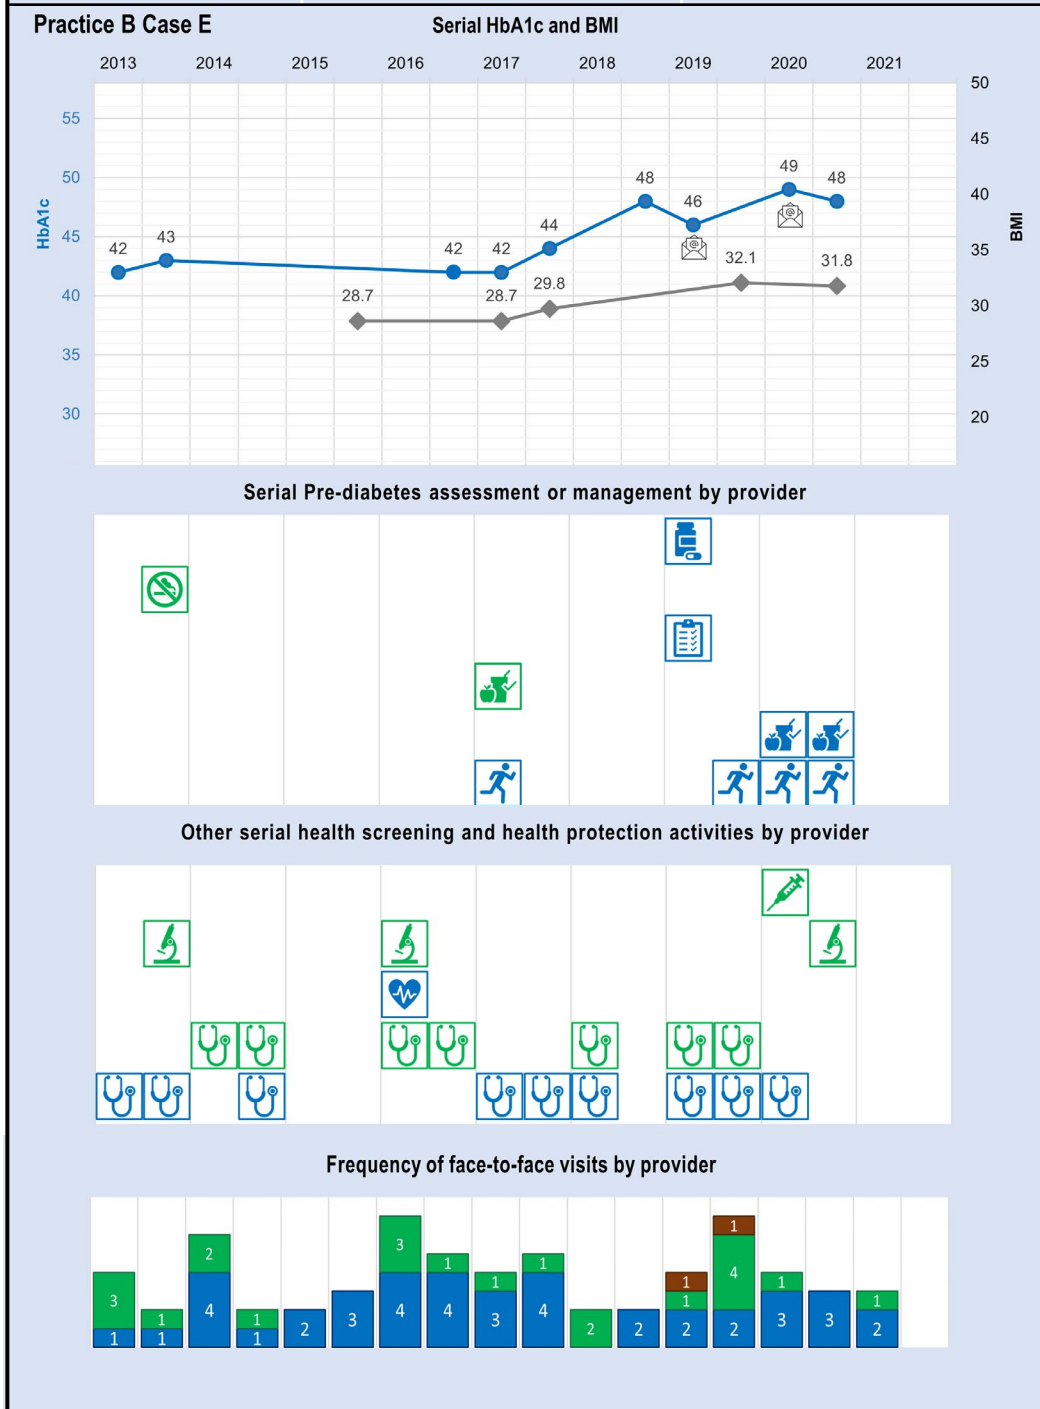

|               |                                                                                                                                                                                                                                                                |
|---------------|----------------------------------------------------------------------------------------------------------------------------------------------------------------------------------------------------------------------------------------------------------------|
| April 2017 Ns | Presenting issue: BP check request bt – concerned about anemia .. Plan) bt, eat well- lots of veges and green veges, red meat, fluids++,                                                                                                                       |
| Jan 2019 GP   | Presenting issue: multiple complaints<br>....discussed results of last BT Dec 2018--Hb/iron levels n, HbA1c 48--see nurse for dietary advice....                                                                                                               |
| May 2019 GP   | Presenting issue: for review blood tests, cough for 3 days discussed prediabetes not keen on taking metformin yet but will try lifestyle changes first....                                                                                                     |
| Nov 2019 GP   | Presenting issue: sore throat, headaches, anxiety<br>...30 mins exercise 3x/wk....                                                                                                                                                                             |
| May 2020 GP   | Presenting issue: Fu blood results – Ph consult<br>Discussed HbA1c getting very close to diabetes level. Suggest she get back to some healthy eating and increase her exercise aim for 30mins of walking/d, doesn't have to be all at once, can break it up... |
| 2020 GP       | Presenting issue: multiple<br>...Dx: Health ed. - diet (6799.00), Dx: Health ed. - exercise (6798.00)...                                                                                                                                                       |

Supplementary Figure 1B Case review example 2
